# Supplementary material
Source: publisher site journal article supplement (https://www.dovepress.com/article/412126)
Supplement: Supplementary file 1 [file get_supplementary_file.php]

Supplementary Table 1: Assessment of Socio-Demographic Characteristics and Hygienic Practice of Vegetables Vendor, Debre Berhan Town, Ethiopia, 2022

| Socio-Demographic Characteristics and Hygienic Practice of Vegetables Vendor | | |
| --- | --- | --- |
| SN | Question | Coding |
|  | Sex | 1. Male |
| 1. Female |
|  | Educational Level of Vendors | 1. Unable to read and write |
| 1. Primary education |
| 1. Secondary education |
| 1. College and above |
|  | Vendors Figure Nail Status | 1. Trimmed |
| 1. Untrimmed |
|  | Kinds of Produce | 1. Lettuce |
| 1. Cabbage |
| 1. Spinach |
| 1. Carrot |
| 1. Tomato |
| 1. Green pepper |
|  | Source of Produce | 1. Farmers |
| 1. Middle men |
| 1. Merchant |
|  | Means of Transportations | 1. By human |
| 1. By cart |
| 1. By car |
|  | Market Type | 1. Supermarket |
| 1. Open market |
|  | Washed before Display | 1. Yes |
| 1. No |
|  | Water Source for Washing | 1. Pipe water |
| 1. Well water |
| 1. River water |
|  | Means of Display | 1. On the floor |
| 1. In bucket |
| 1. On the shelf |
|  | Sampling Time | 1. Morning |
| 1. Afternoon |

**Questionnaires were developed based on a review of different literatures.**

Supplementary Table 2: List of antibiotics used in the study

| **S. NO** | **Antibiotics used** | **Class** |
| --- | --- | --- |
|  | Amoxicillin (AMC, 30μg) | Penicillin |
|  | Ampicillin (AMP, 30μg) | Penicillin |
|  | Penicillin (PEN, 10μg) | Penicillin |
|  | Cotrimoxazole (SXT, 30μg) | Sulfonamides |
|  | Ciprofloxacin (CIP, 5μg) | Quinolone |
|  | Chloramphenicol (CAF, 30μg) | Protein synthesis inhibitor |
|  | Gentamicin (GEN, 10μg) | Aminoglycoside |
|  | Erythromycin (ERY, 15μg) | Macrolide |
|  | Tetracycline (TET, 30μg) | Tetracycline |
|  | Doxycycline (DXT, 30μg) | Tetracycline |
|  | Cefoxitin (FOX, 5 µg) | Cephalosporin |
|  | Ceftriaxone (CRO, 30μg) | Cephalosporin |
|  | Cefotaxime (CTX, 30μg) | Cephalosporin |
|  | Ceftazidime (CAZ, 30μg). | Cephalosporin |
|  | Imipenem (IMI, 10μg) | Carbapenem |
|  | Meropenem (MRP, 10μg) | Carbapenem |
